# Supplementary material for: Magnetic and electronic properties of 2D TiX3 (X = F, Cl, Br and I)
Source: Royal Society of Chemistry journal article supplement (doi:10.1039/d0cp02072a), 2020-01-01
Supplement: d0cp02072a1.pdf [file d0cp02072a1.pdf]

## Supplemental material for publication

### Magnetic and electronic properties of 2D $\text{TiX}_3$ ( $X = \text{F}, \text{Cl}, \text{Br}, \text{I}$ )

Jiazhong Geng<sup>1</sup>, Iat-Neng Chan<sup>2</sup>, Haoqiang Ai<sup>3</sup>, Kin Ho Lo<sup>3</sup>, Yoshiyuki Kawazoe<sup>4,5,6</sup>, Kar Wei Ng<sup>1\*</sup>  
and Hui Pan<sup>1, 2\*</sup>

<sup>1</sup> Institute of Applied Physics and Materials Engineering, University of Macau, Macao, P. R. China

<sup>2</sup> Department of Physics and Chemistry, Faculty of Science and Technology, University of Macau, Macao SAR

<sup>3</sup> Department of Electrochemical Engineering, Faculty of Science and Technology, University of Macau, Macao SAR

<sup>4</sup> New Industry Creation Hatchery Center, Tohoku University, Sendai, Japan

<sup>5</sup> Department of Physics and Nanotechnology, SRM Institute of Science and Technology, Kattankulathur 603203, Tamil Nadu, India

<sup>6</sup> School of Physics, Suranaree University of Technology, 111 University Avenue Muang, Nakhon Ratchasima 30000, Thailand

Corresponding Authors: H. Pan ([huipan@um.edu.mo](mailto:huipan@um.edu.mo)), Tel: 853-88224427, Fax: 853-88222425; K. W. Ng ([billyng@um.edu.mo](mailto:billyng@um.edu.mo))

Table S1. Calculated lattice constants ( $\text{\AA}$ ) of  $\text{TiX}_3$  monolayers with different U-J values

| U-J/eV          | 3    | 4    | 5    | 6    |
|-----------------|------|------|------|------|
| $\text{TiF}_3$  | 5.55 | 5.61 | 5.62 | 5.63 |
| $\text{TiCl}_3$ | 6.29 | 6.33 | 6.35 | 6.38 |
| $\text{TiBr}_3$ | 6.65 | 6.66 | 6.68 | 6.68 |
| $\text{TiI}_3$  | 7.15 | 7.19 | 7.20 | 7.21 |

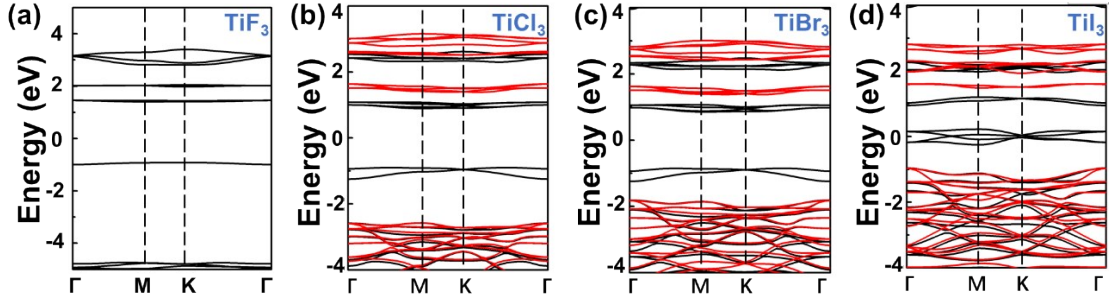

Fig. S1 Electronic band structures of (a)  $\text{TiF}_3$ , (b)  $\text{TiCl}_3$ , (c)  $\text{TiBr}_3$  and (d)  $\text{TiI}_3$  calculated with U-J = 3 eV from the DFT + U method. The Fermi level was set to 0 eV.  $\Gamma$  (0, 0, 0), M (1/2, 0, 0), and K (1/3, 1/3, 0) are highly symmetric points in reciprocal space. Red - spin down; black - spin up.

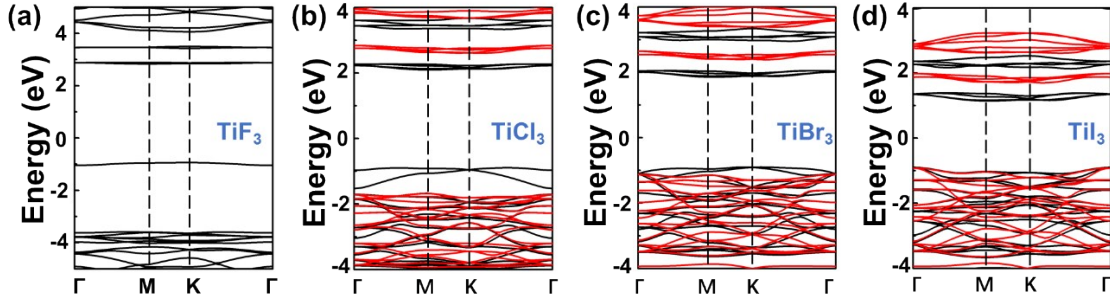

Fig. S2 Electronic band structures of (a)  $\text{TiF}_3$ , (b)  $\text{TiCl}_3$ , (c)  $\text{TiBr}_3$  and (d)  $\text{TiI}_3$  calculated with U-J = 5 eV from the DFT + U method. The Fermi level was set to 0 eV.  $\Gamma$  (0, 0, 0), M (1/2, 0, 0), and K (1/3, 1/3, 0) are highly symmetric points in reciprocal space. Red - spin down; black - spin up.

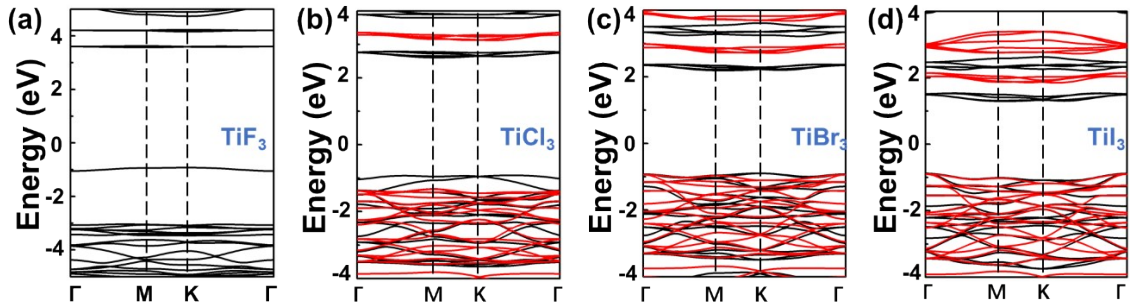

Fig. S3 Electronic band structures of (a)  $\text{TiF}_3$ , (b)  $\text{TiCl}_3$ , (c)  $\text{TiBr}_3$  and (d)  $\text{TiI}_3$  calculated with U-J = 6 eV from the DFT + U method. The Fermi level was set to 0 eV.  $\Gamma$  (0, 0, 0), M (1/2, 0, 0), and K (1/3, 1/3, 0) are highly symmetric points in reciprocal space. Red - spin down; black - spin up.

Table S2 Band gaps (eV) of  $\text{TiX}_3$  monolayers with different U-J values

| U-J/eV          | 3    | 4    | 5    | 6    |
|-----------------|------|------|------|------|
| $\text{TiF}_3$  | 2.32 | 3.04 | 3.77 | 4.49 |
| $\text{TiCl}_3$ | 1.79 | 2.39 | 2.99 | 3.52 |
| $\text{TiBr}_3$ | 1.70 | 2.27 | 2.76 | 3.09 |
| $\text{TiI}_3$  | 0.02 | 1.91 | 2.05 | 2.18 |

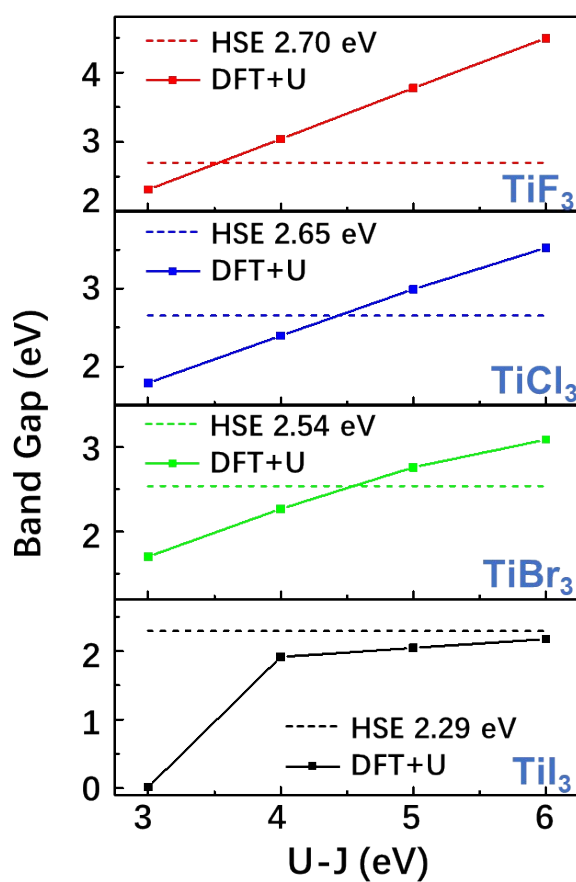

Fig. S4 Band gap of (a)  $\text{TiF}_3$ , (b)  $\text{TiCl}_3$ , (c)  $\text{TiBr}_3$  and (d)  $\text{TiI}_3$  as a function of U compared with the band gaps calculated with HSE06.

Tab. S3 Calculated total magnetic moments per unit cell ( $M_{\text{tot}}$ ), local Magnetic moments of Ti ( $M_{\text{Ti}}$ ) and Br/I ( $M_{\text{X}}$ ) in monolayer  $\text{TiBr}_3$  and  $\text{TiI}_3$

|                               | $\text{TiBr}_3$ |            |            | $\text{TiI}_3$ |            |            |
|-------------------------------|-----------------|------------|------------|----------------|------------|------------|
|                               | FM              | AFM-N      | AFM-z      | FM             | AFM-N      | AFM-z      |
| $M_{\text{tot}}(\mu\text{b})$ | 1.71            | 0          | 0          | 1.72           | 0          | -0.02      |
| $M_{\text{Ti}}(\mu\text{b})$  | 0.98            | -0.95/0.95 | -0.97/0.97 | 1.04           | -1.01/1.01 | -1.02/1.02 |
| $M_{\text{X}}(\mu\text{b})$   | -0.04           | 0          | -0.04/0.04 | -0.06          | 0          | -0.05/0.05 |

Tab. S4 Exchange energies ( $E_{\text{ex}}$ ) of  $\text{TiX}_3$  monolayers (per  $\text{TiX}_3$  formula meV/s.f.) with different U-J values

| U-J/eV          | 3     | 4     | 5     | 6     |
|-----------------|-------|-------|-------|-------|
| $\text{TiF}_3$  | -2.01 | -3.01 | -1.67 | -1.28 |
| $\text{TiCl}_3$ | 4.23  | 3.94  | 2.10  | 1.72  |
| $\text{TiBr}_3$ | 3.88  | 27.54 | 27.39 | 27.56 |
| $\text{TiI}_3$  | 3.56  | 26.24 | 25.68 | 26.01 |
